# Supplementary material
Source: PubMed Central journal article supplement (PMC6278913)
Supplement: NIHMS80660-supplement-Supplementary_Tables.pdf [file NIHMS80660-supplement-Supplementary_Tables.pdf]

25 **SUPPLEMENTARY TABLES**

26

27

**A**

|                          |                    | GAERS      |             |            |                 |             |             |                    |            |            |
|--------------------------|--------------------|------------|-------------|------------|-----------------|-------------|-------------|--------------------|------------|------------|
|                          |                    | TC         |             |            | Wake Active NRT |             |             | Wake Quiescent NRT |            |            |
|                          |                    | Seizure    | Wake        | Sleep      | Seizure         | Wake        | Sleep       | Seizure            | Wake       | Sleep      |
| <b>Total Firing (Hz)</b> | <b>Mean</b>        | <b>5.4</b> | <b>11.4</b> | <b>5.5</b> | <b>52.0</b>     | <b>38.6</b> | <b>19.2</b> | <b>3.8</b>         | <b>4.6</b> | <b>4.8</b> |
|                          | <b>9th Pctile</b>  | 1.0        | 3.2         | 7.9        | 11.5            | 21.2        | 10.9        | 0.1                | 0.8        | 0.0        |
|                          | <b>91st Pctile</b> | 10.9       | 18.6        | 9.7        | 72.5            | 55.9        | 33.0        | 10.0               | 8.0        | 12.5       |
| <b>Burst Firing (Hz)</b> | <b>Mean</b>        | <b>0.9</b> | <b>0.4</b>  | <b>0.8</b> | <b>1.6</b>      | <b>0.3</b>  | <b>0.4</b>  | <b>0.3</b>         | <b>0.2</b> | <b>0.2</b> |
|                          | <b>9th Pctile</b>  | 0.0        | 0.0         | 0.1        | 0.1             | 0.1         | 0.1         | 0.0                | 0.0        | 0.1        |
|                          | <b>91st Pctile</b> | 0.8        | 0.5         | 1.0        | 3.7             | 0.4         | 0.8         | 1.3                | 0.5        | 0.7        |
| <b>Tonic Firing (Hz)</b> | <b>Mean</b>        | <b>2.8</b> | <b>9.3</b>  | <b>2.4</b> | <b>14.1</b>     | <b>25.0</b> | <b>9.7</b>  | <b>2.1</b>         | <b>2.9</b> | <b>2.7</b> |
|                          | <b>9th Pctile</b>  | 0.6        | 2.1         | 0.7        | 1.1             | 13.1        | 5.6         | 0.0                | 0.6        | 0.0        |
|                          | <b>91st Pctile</b> | 4.7        | 14.3        | 4.6        | 24.3            | 31.9        | 17.4        | 5.7                | 5.9        | 6.5        |

28

**B**

|                               |                    | GAERS      |            |            | GHB        |            |            |
|-------------------------------|--------------------|------------|------------|------------|------------|------------|------------|
|                               |                    | TC         | WA NRT     | WQ NRT     | TC         | WA NRT     | WQ NRT     |
| <b>Total Firing (per SWC)</b> | <b>Mean</b>        | <b>0.9</b> | <b>6.2</b> | <b>0.5</b> | <b>0.9</b> | <b>2.4</b> | <b>2.4</b> |
|                               | <b>9th Pctile</b>  | 0.1        | 1.4        | 0.0        | 0.2        | 1.2        | 1.2        |
|                               | <b>91st Pctile</b> | 1.8        | 10.7       | 1.4        | 2.2        | 5.2        | 1.2        |
| <b>Burst Firing (per SWC)</b> | <b>Mean</b>        | <b>0.1</b> | <b>0.2</b> | <b>0</b>   | <b>0.1</b> | <b>0.2</b> | <b>0</b>   |
|                               | <b>9th Pctile</b>  | 0.0        | 0          | 0          | 0          | 0          | 0          |
|                               | <b>91st Pctile</b> | 0.4        | 0.5        | 0.5        | 0.3        | 0.3        | 0.1        |
| <b>Tonic Firing (per SWC)</b> | <b>Mean</b>        | <b>0.4</b> | <b>1.7</b> | <b>0.3</b> | <b>0.5</b> | <b>0.8</b> | <b>0.8</b> |
|                               | <b>9th Pctile</b>  | 0.1        | 0.0        | 0.0        | 0.1        | 0.5        | 0.5        |
|                               | <b>91st Pctile</b> | 0.8        | 3.3        | 3.3        | 1.3        | 1.4        | 1.4        |

29

30

31

32 **Supplementary Table 1. Firing rates of TC and NRT neurons during different**  
33 **behavioral states in GAERS and during GHB-elicited ASs.**

34 Mean firing rates in Hz (A) and per-SWC (B) (with 9<sup>th</sup> and 91<sup>st</sup> percentiles (Pctile)) for each  
35 neuronal population (GAERS TC n = 139; wake-active, WA, NRT n = 13; wake-quiescent,  
36 WQ, NRT n = 12) (GHB TC n = 39; wake-active, WA, NRT; n = 18, wake-quiescent, WQ,  
37 NRT n = 3) during wake/interictal periods, ASs and non-REM sleep.

38

|                     | GAERS  |        | GHB    |        |
|---------------------|--------|--------|--------|--------|
|                     | TC     | WA NRT | TC     | WA NRT |
| <b>Total Firing</b> | -15 ms | +9 ms  | -13 ms | +8 ms  |
| <b>Burst Firing</b> | -16 ms | +7 ms  | -14 ms | -2 ms  |
| <b>Tonic Firing</b> | -17 ms | +28 ms | -7 ms  | +10 ms |

39 **Supplementary Table 2. Latency of the peak of TC and NRT neuron firing to the SWC**  
40 **spike during ASs in GAERS and GHB models.**

41 Values are the latency of the peak of different firing types (total, burst, tonic) of TC and  
42 wake-active (WA) NRT neurons with respect to the SWC spike (set as time 0), calculated  
43 from the SWC spike-triggered averages shown in Fig. 4a and Supplementary Fig. 8a. Wake-  
44 quiescent NRT neurons are not included because of the lack of identifiable peaks in their ictal  
45 firing (Supplementary Fig. 8a).

46

| Neurons | $g_{SE}$ (% of Pas) | $g_{SI}$ (% of Pas) | $SD_{g_{SE}}$ (%) | $SD_{g_{SI}}$ (%) |
|---------|---------------------|---------------------|-------------------|-------------------|
| TC      | 20                  | 80                  | 100               | 100               |
| NRT1    | 20                  | 80                  | 60                | 60                |
| NRT2    | 20                  | 80                  | 60                | 60                |
| PY1     | 20                  | 80                  | 150               | 150               |
| PY2     | 20                  | 80                  | 150               | 150               |

| Synapses         | G ( $\mu S$ ) | Delay (ms) |
|------------------|---------------|------------|
| TC-PY1 (AMPA)    | 0.02          | 2          |
| TC-PY2 (AMPA)    | 0.01          | 2          |
|                  |               |            |
| PY1-TC1 (AMPA)   | 0.015         | 2          |
| PY2-TC2 (AMPA)   | 0.0001        | 2          |
|                  |               |            |
| PY1-NRT1 (AMPA)  | 0.005         | 2          |
| PY1-NRT2 (AMPA)  | 0.005         | 2          |
| PY2-NRT1 (AMPA)  | 0.005         | 2          |
| PY2-NRT2 (AMPA)  | 0.005         | 2          |
|                  |               |            |
| TC-NRT1 (AMPA)   | 0.03/0.001    | 0          |
| TC-NRT2 (AMPA)   | 0.03/0.001    | 0          |
|                  |               |            |
| NRT1-TC (GABA-A) | 0.1           | 0          |
| NRT2-TC (GABA-A) | 0.1           | 0          |

47

48 **Supplementary Table 3. Biophysical model main parameters.**

49 Note the two values of TC-NRT synaptic weight that were tested in Fig. 8c and d. Delay is  
50 the synaptic delay,  $g_{SE}$  is the average excitatory synaptic conductance,  $SD_{g_{SE}}$  is the standard  
51 deviation of the excitatory synaptic conductance.  $g_{SI}$  is the average inhibitory synaptic  
52 conductance, and  $SD_{g_{SI}}$  is the standard deviation of the inhibitory synaptic conductance. Pas  
53 is passive conductance.
